1

2 **The dynamics of preferential host switching: host**  
3 **phylogeny as a key predictor of parasite prevalence and**  
4 **distribution**

5

6 Jan Engelstädter\* & Nicole Z. Fortuna

7

8

9 School of Biological Sciences, The University of Queensland, Brisbane, Australia

10

11 \* Corresponding author.

12 Address: The University of Queensland, School of Biological Sciences, Brisbane,

13 QLD 4072, Australia

14 Phone: +61 7 336 57959

15 Email: [j.engelstaedter@uq.edu.au](mailto:j.engelstaedter@uq.edu.au)

16

17 Keywords: host-shifts, host switches, codiversification, host-parasite coevolution,  
18 emerging diseases, mathematical model, host range

19

20 Authorship: JE conceived and designed the project, JE and NZF implemented the  
21 model, analysed the simulation results and wrote the paper.

22

## 23 **Abstract**

24 New parasites commonly arise through host-shifts, where parasites from one host  
25 species jump to and become established in a new host species. There is much  
26 evidence that the probability of host-shifts decreases with increasing phylogenetic  
27 distance between donor and recipient hosts, but the consequences of such  
28 preferential host switching remain little explored. We develop a mathematical model  
29 to investigate the dynamics of parasite host-shifts in the presence of this  
30 phylogenetic distance effect. Host trees evolve under a stochastic birth-death  
31 process and parasites co-evolve concurrently on those trees, undergoing host-shifts,  
32 co-speciation and extinction. Our model indicates that host trees have a major  
33 influence on these dynamics. This applies both to individual trees that evolved under  
34 the same stochastic process and to sets of trees that evolved with different  
35 macroevolutionary parameters. We predict that trees consisting of a few large clades  
36 of host species and those with fast species turnover should harbour more parasites  
37 than trees with many small clades and those that diversify more slowly. Within trees,  
38 large clades should exhibit a higher infection frequency than small clades. We  
39 discuss our results in the light of recent cophylogenetic studies in a wide range of  
40 host-parasite systems, including the intracellular bacterium *Wolbachia*.

## 41 Introduction

42 Parasitism represents one of the most successful modes of life. Humans harbour  
43 more than 1400 species of parasites (Taylor *et al.* 2001), which extrapolates to an  
44 enormous total number of parasites across all host species. Where do all these  
45 parasites come from? Some parasites may already have been present in their host  
46 species' ancestor and maintained ever since. This scenario of 'cospeciation' has  
47 been described in some mutualists but appears to be rare in parasites (de Vienne *et*  
48 *al.* 2013). Other parasites may originate from organisms that are either free-living, or  
49 non-parasitic symbionts (Crook 2014; Hurst 2016). Finally, some parasites may have  
50 switched from another host species to their present-day host. Such host-shifts have  
51 been widely documented. The majority of human pathogens originate through host-  
52 shifts, including HIV and malaria (Wolfe *et al.* 2007). Host-shifts are also the  
53 predominant cause of new host-parasite associations for *Wolbachia* endosymbionts  
54 and their arthropod hosts (Werren *et al.* 1995), rabies viruses in bats (Streicker *et al.*  
55 2010), lentiviruses in primates (Sharp *et al.* 2000), oomycetes in Asteraceae (Choi &  
56 Thines 2015), and malaria in birds (Ricklefs *et al.* 2014).

57 Establishing a sustainable relationship with a new host species represents a  
58 considerable challenge to parasites. While many opportunities for host-switches  
59 exist, most attempts are unsuccessful and lead to mere 'spill-over' infections, i.e.  
60 infections with no or short transmission chains (Taylor *et al.* 2001; Wood *et al.* 2012).  
61 Examples of such spillovers in humans include rabies, Hendra, and Ebola viruses.  
62 Successful host-shifts are difficult because the parasite must be able to enter,  
63 proliferate within, and transmit efficiently between, members of a new host species  
64 that they are not adapted to. These requirements mean that all else being equal,

65 shifts to new hosts that are similar to the original host with respect to relevant traits  
66 should be easier than shifts to hosts that are very different from the original one.  
67 Given that this similarity will be positively correlated with phylogenetic relatedness  
68 between host species, we can predict that host-shifts to closely related new hosts  
69 should be more common than host-shifts to distantly related hosts (Charleston &  
70 Robertson 2002; Engelstädter & Hurst 2006; Longdon *et al.* 2014). We will refer to  
71 this expectation as the ‘phylogenetic distance effect’.

72 There are two lines of evidence for the phylogenetic distance effect. First, a number  
73 of transfection experiments have been conducted in which parasites from one  
74 species were exposed to a range of hosts from different species. For example,  
75 Longdon *et al.* (2011) demonstrated that for three sigma viruses endogenous to  
76 different species of *Drosophila*, phylogenetic distance between the donor and  
77 recipient host species was negatively correlated with the viruses’ ability to replicate  
78 within the recipient host. Similarly, for male-killing *Spiroplasma* bacteria in ladybird  
79 beetles, Tinsley & Majerus (2007) reported that as the distance between the original  
80 host and a new host increased, the ability of the parasite to kill male offspring (the  
81 phenotype driving the infection) was reduced. Other systems in which experimental  
82 evidence for the phylogenetic distance effect has been obtained include nematodes  
83 infecting *Drosophila* flies (Perlman & Jaenike 2003), feather-lice infecting pigeons  
84 and doves (Clayton *et al.* 2003), and plant-fungal systems (Gilbert & Webb 2007; de  
85 Vienne *et al.* 2009). (De Vienne *et al.* (2009) also showed that the phylogenetic  
86 distance between a native and a new parasite was a good predictor of infection  
87 success as well.) Strong evidence for the phylogenetic distance effect from 25

88 publications reporting the success or failure of *Wolbachia* transfection experiments is  
89 reviewed in Russell *et al.* (2009).

90 Second, different phylogenetic methods have been used to investigate whether host-  
91 shifts occur preferentially between related host species. Much early work comparing  
92 host and parasite phylogenetic trees focused on reconciling those trees and  
93 identifying the degree of cospeciation. However, Charleston & Robertson (2002)  
94 showed that the observation that closely related lentiviruses tend to infect closely  
95 related primate hosts is best explained not by codivergence but by preferential host-  
96 switching between related hosts (because the viruses only spread relatively recently  
97 on the primate tree). Studies of rabies viruses infecting various bat species  
98 confirmed the presence of the phylogenetic distance effect (Streicker *et al.* 2010) and  
99 further demonstrated that while species range overlap was the best predictor of  
100 spillover events, phylogenetic distance was the best predictor of host-shift events  
101 (Faria *et al.* 2013). Clark & Clegg (2017), studying the distribution of malaria among  
102 south-Melanesian birds, found that despite ample opportunity for host-switching due  
103 to vector-borne transmission, similar parasites were restricted to similar hosts. Some  
104 studies have also provided evidence that *Wolbachia* endosymbionts switch  
105 preferentially between related arthropod host species (Baldo *et al.* 2008; Russell *et*  
106 *al.* 2009; see also Discussion). In summary, the experimental and comparative work  
107 indicates that although not ubiquitous (e.g., Stahlhut *et al.* 2010; Longdon *et al.*  
108 2015), the phylogenetic distance effect is an important determinant of host-shifts in  
109 many systems.

110 Most of the previous theoretical work on host-shifts has focused on reconciling host  
111 and parasite phylogenetic trees, identifying host-shift vs. cospeciation events, and

112 inferring parameters underlying these processes (older literature reviewed in de  
113 Vienne *et al.* 2013; newer work includes Baudet *et al.* 2015; Wieseke *et al.* 2015;  
114 Drinkwater & Charleston 2016; Alcalá *et al.* 2017). Mathematically speaking, these  
115 are very hard problems and most of the developed algorithms are computationally  
116 expensive. It is therefore not surprising that the phylogenetic distance effect is  
117 usually not considered in these methods, despite the widely recognised fact that  
118 preferential host switching may be misinterpreted as cospeciation (de Vienne *et al.*  
119 2007). Exceptions include a study where data from RNA virus-mammal associations  
120 were used to test two different models describing the decline in host-shift success  
121 with increasing phylogenetic distance between host species (Cuthill & Charleston  
122 2013), and a study in which the host-shift dynamics of protozoan parasites in new  
123 world monkeys were inferred (Waxman *et al.* 2014). In contrast to the development  
124 of inference methods for host-parasite cospeciation and host-shifts, little work has  
125 been done to explore the consequences of the phylogenetic distance effect for the  
126 dynamics of parasites spread between host species the expected patterns of  
127 parasite distribution. In simulations of parasite host switching, Engelstädter and  
128 Hurst (2006) demonstrated that the ‘shape’ of a host clade strongly influences  
129 parasite prevalence and distributions within host clades. However, their model (like  
130 the model by de Vienne *et al.* 2007) only considered a few idealised host trees (e.g.,  
131 either completely symmetrical or ladder-like), and they (like Cuthill & Charleston  
132 2013; Waxman *et al.* 2014) assumed that host switching occurred only at the tips of  
133 the trees.

134 Here, we present the results of a stochastic model in which a clade of host species  
135 evolves under a birth-death process and a clade of parasites spreads concurrently

136 on this host tree through both cospeciation events and host-shifts (either preferential  
137 or random). Through extensive computer simulations we investigate how often the  
138 parasites can invade a naïve host tree, how many hosts will become infected and  
139 how the parasites are distributed across host species. Our model predicts that both  
140 individual host phylogenies and the macroevolutionary processes underlying these  
141 phylogenies have a major influence on host-shift dynamics when the phylogenetic  
142 distance effect is important.

## 143 **Methods**

### 144 *Mathematical model*

145 We considered a stochastic model of host-parasite co-diversification, illustrated in  
146 Figure 1. Host trees emerge from a single ancestor according to a density-dependent  
147 birth-death process. Hosts go extinct at a constant rate  $\mu$  and speciate at a baseline  
148 rate  $\lambda$  that is multiplied by the term  $(1-N/K)$ , resulting in a decreasing speciation rate  
149 as the number of host species  $N$  approaches the carrying capacity  $K$ .

150 Each parasite species is associated with a single host species. Parasites go extinct  
151 at a constant rate  $\nu$  and always co-speciate whenever their hosts speciate. Host-  
152 shifts represent an alternative, independent mode of parasite speciation in which one  
153 lineage remains associated with the original host and a new lineage arises that is  
154 associated with a new host species. Host-shifts occur at a baseline rate  $\beta(N-1)$  per  
155 parasite lineage. Potential new hosts are chosen randomly but not all host-shifts are  
156 successful. First, host-shifts are unsuccessful if the new host is already infected (but  
157 see below for an extension of the model where this assumption is relaxed). Second,  
158 parasites may not become established if the new host is phylogenetically too distant

159 from the original one. Specifically, we assume a parasite establishment probability,  
160  $\exp(-\gamma D_{ij})$ . (The same relationship but using a different notation was used by  
161 Engelstädter & Hurst 2006; Cuthill & Charleston 2013). Here, the parameter  
162  $\gamma$  determines how fast the establishment probability declines with increasing  
163 phylogenetic distance  $D_{ij}$  between the donor host species  $i$  and the new host species  
164  $j$  (i.e.,  $D_{ij}$  is the total length of branches connecting the two species with their most  
165 recent common ancestor). When  $\gamma=0$ , all host-shifts are successful (no phylogenetic  
166 distance effect) but with larger values of  $\gamma$ , host species that are distantly related to  
167 the original host are increasingly unlikely to become infected.

168 In addition to this basic model, we also investigated three model extensions that  
169 incorporate 1) coinfection of multiple parasites in one host species, 2) parasite loss  
170 during cospeciation, and 3) within-host speciation of parasites. For details we refer to  
171 the Supplementary Information (SI), section 1.

### 172 *Model implementation*

173 We analysed our model using computer simulations. Time proceeds in small steps  
174 ( $\Delta t=10^{-4}$ ) in which the different events (host speciation, host extinction etc.) take  
175 place with probabilities given by their rates multiplied by  $\Delta t$ . Since host evolution is  
176 not affected by the parasites in our model, we first simulated the host trees and then  
177 simulated parasite diversification on those host trees.

178 The routines to simulate the cophylogenetic process were implemented in the  
179 programming language R (R Core Team 2017). We bundled these routines, along  
180 with other functions for simulation, subsequent analyses and plotting of  
181 cophylogenetic trees, into a new R-package named 'cophy'. This package depends  
182 on the R-packages ape v4.1 (Paradis *et al.* 2004), parallel v3.3.2 (R Core Team



183 2017), foreach v1.4.3 (Revolution Analytics & Weston 2015b), and doParallel v1.0.10  
184 (Revolution Analytics & Weston 2015a). We used the R-packages devtools v1.13.2  
185 (Wickham & Chang 2017) and roxygen2 v6.0.1 (Wickham *et al.* 2017) to generate  
186 our package. The cophy package will be made available on CRAN upon publication  
187 of this article. For data analysis, we also used lme4 v1.1-12 (Bates *et al.* 2015) and  
188 vegan v2.4-5 (Oksanen *et al.* 2017).

### 189 *Simulations*

190 We started by simulating different sets of host trees, each containing 100 trees that  
191 were initialised with a single species and evolved for 100 time units. Only trees that  
192 survived this time span were retained. For an initial standard set of trees, we chose a  
193 speciation rate of  $\lambda=1$ , an extinction rate of  $\mu=0.5$  and a carrying capacity of  $K=200$ ,  
194 yielding an expected equilibrium tree size of  $N=100$  species. Using this set as a  
195 baseline, we created three series of similar sets with 1) the same speciation and  
196 extinction rate but with  $N$  increasing from 30 to 200, 2) the same equilibrium clade  
197 size and net diversification rate ( $\lambda-\mu=0.5$ ), but extinction rate  $\mu$  increasing from 0.1 to  
198 0.9, and 3) eight other sets with the same equilibrium clade size but different net  
199 diversification and turnover rates (see SI section 2.1 for details).

200 To simulate parasite diversification on those host trees, we introduced a single  
201 parasite species at time  $t=50$  on a given host tree and simulated until the parasite  
202 went extinct or the present ( $t=100$ ) was reached. For each host tree, we randomly  
203 chose ten branches on which the first parasite species arrived and performed ten  
204 replicate simulations for each of these initial branches. Thus, for each set of host  
205 trees we performed a total of  $100 \times 10 \times 10 = 10,000$  simulations.

206 We focused on two parameter sets for parasite evolution. First, we used a parameter  
207 combination with which the phylogenetic distance effect is present:  $\beta=0.5$ ,  $\gamma=0.06$   
208 and  $\nu=1$ . Second, as a control, we used a parameter combination with which the  
209 phylogenetic distance effect is absent:  $\beta=0.02$ ,  $\gamma=0$  and  $\nu=1$ . We refer to these two  
210 standard parameter combinations as the standard PDE and no-PDE parameters,  
211 respectively. The parameters were chosen so that both the probability of parasite  
212 establishment and the observed frequency of infected hosts at the end of the  
213 simulation are roughly the same (around 0.5; see Results). In order to test whether  
214 our results are robust with respect to the choice of parameters, we also performed  
215 simulations with two other PDE / no-PDE parameter combinations that are  
216 characterised by either a lower or a higher turnover rate in parasite diversification.  
217 Finally, we also performed the same simulations for our three model extensions (SI  
218 section 1).

### 219 *Analyses of results*

220 For each simulation we obtained some basic statistics, including the fraction of  
221 simulations in which the parasites established a surviving infection on the host trees,  
222 the distribution of the number of host and parasite species and the frequency of  
223 infected hosts at the end of the simulation (contingent on parasite survival). For  
224 parasite trees that did not leave any surviving species we obtained the time of  
225 extinction, and for those which did we obtained the time of the most recent common  
226 ancestor of all extant species. As a simple statistic describing the distribution of  
227 parasites within the host phylogeny we used the correlation coefficient between host  
228 and parasite phylogenetic distances (see SI, section 2.2). We also investigated the

229 frequency of infected host species within different clades of the host tree (see SI  
230 section 2.3).

## 231 **Results**

### 232 *Patterns of parasite spread and distributions*

233 We first focused on understanding the host-shift dynamics under the phylogenetic  
234 distance effect on a standard set of host trees simulated under the same birth-death  
235 process. Figure 2 compares some basic summary statistics for simulations in  
236 presence vs. absence of the phylogenetic distance effect (standard PDE vs. no-PDE  
237 parameters). By choice of parameters, the final mean frequency of infected hosts for  
238 simulations with surviving parasites was similar in both cases (Fig. 2A). However, the  
239 variance in infection frequencies was greater with the phylogenetic distance effect  
240 than without (see also below). If the parasites went extinct, this usually occurred  
241 early during the simulations in both scenarios (Fig. 2B). The most recent common  
242 ancestor of all surviving parasites lived later on average with than without the  
243 phylogenetic distance effect (Fig. 2C), reflecting higher parasite turnover in the latter  
244 case.

245 In Figure 2D, we plot the distribution of correlation coefficients between phylogenetic  
246 distances between pairs of parasite species and the phylogenetic distances between  
247 their associated host species. In the presence of the phylogenetic distance effect,  
248 this distribution shows a strong positive trend: >98% of simulations where the  
249 parasites survived exhibited a positive correlation, with a median of 0.807. Thus,  
250 closely related parasites tend to be found in closely related host species and *vice*  
251 *versa*. This is not primarily a consequence of co-speciation events but of the

252 phylogenetic distance effect. In the absence of the phylogenetic distance effect, the  
253 host-parasite phylogenetic correlation coefficients are distributed around zero. The  
254 median of this distribution is still positive (0.021), which is explained by recent co-  
255 speciation events, but the distribution is very distinct from the one observed in the  
256 presence of the phylogenetic distance effect.

257 We can also ask how parasites are distributed within different host clades when the  
258 phylogenetic distance effect is important. Parasites will shift predominantly within  
259 host clades but rarely between different clades in this case. One might therefore  
260 expect that all else being equal, larger host clades should on average harbour more  
261 parasites than smaller clades. Figure S1 shows that this expectation is fulfilled both  
262 when host trees are split into a few large and into many small clades (Fig. S1A and  
263 B). In the absence of the phylogenetic distance effect, host clade size has no effect  
264 on the fraction of hosts that are infected within those clades (Fig. S1C and D).

#### 265 *Host trees are important in determining parasite spread*

266 Figure 3A shows that in the presence of the phylogenetic distance effect, the  
267 distribution of the fraction of infected host species observed at the end of the  
268 simulations differs according to host tree. A random effects model confirms the visual  
269 impression that much of the variation in the fraction of infected host species  
270 observed at the end of the simulations is due to the specific host tree on which the  
271 parasites spread (see SI, section 2). By contrast, in the absence of the phylogenetic  
272 distance effect, the observed mean infection frequencies are much more  
273 homogeneous across host trees (Figure 3B), with a lower fraction of variance  
274 explained by host trees (SI section 2).

275 To obtain some intuition for the importance of host trees in shaping host-shift  
276 dynamics, consider the example co-phylogenies shown in Figures 3C and S2,  
277 corresponding to host trees number 1, 5 and 25. With host tree #1 (Fig. 3C and  
278 S2A), most of the extant host species form one large, relatively recently formed clade  
279 of species. A second, smaller clade is still closely related to the first one. This means  
280 that for most host species there is an abundance of closely related host species,  
281 which enables the parasites to readily undergo host switches and thus reach a high  
282 frequency. Host tree #5 (Figs. 3C and S2B) shows the opposite extreme: the host  
283 tree consists of several clades that are only distantly related to each other. Parasite  
284 spread and survival within those clades is difficult because these clades are small,  
285 and switches between clades are unlikely. Combined, this explains the low infection  
286 frequencies observed on this tree. Host tree #25 (Fig. S2C, D) contains a large clade  
287 of closely related host species in which the parasites can thrive. If the parasites are  
288 successful in infecting this large clade, they can reach a high frequency of infected  
289 host species (Fig. S2C). However, this clade is very isolated from the other clades  
290 and connected to the rest of the tree by a long branch. Therefore, in many cases the  
291 parasites fail to reach this clade and are confined to the other, much smaller clades  
292 (Fig. S2D). As a consequence, we observe a bimodal distribution of infection  
293 frequencies for this tree.

294 To formalise some of the above intuitive explanations for variation in parasite  
295 abundance across host trees, we calculated for each host tree the Shannon index for  
296 the distribution of host species among different host clades (see SI section 1.3). This  
297 Shannon index is greater the more host clades there are and the more evenly  
298 species are distributed among those clades. Figure 4 shows that the Shannon index

299 is negatively correlated with the fraction of infected host species, indicating that host  
300 trees whose species are clustered in a with few large clades are most conducive to  
301 parasite spread. In line with these results, we also found that tree imbalance, as  
302 measured by the Colless index (Colless 1982; Heard 1992), has a similar effect but  
303 explains less of the variance in infection frequencies than the Shannon index of  
304 clade sizes (see SI section 3.1; Fig. S3).

#### 305 *Robustness to parasite parameters and model assumptions*

306 We repeated all simulations with a higher parasite transmission rate ( $\beta=1$ ) and a  
307 higher extinction rate ( $\nu=2$ ). Figures S4 and S5 show that our results are very robust  
308 to this change in parameters. We also re-ran our simulations relaxing the assumption  
309 that no coinfections can occur, that parasites can be lost during host speciation or  
310 that they can speciate within a host lineage; again, this did not qualitatively affect our  
311 results (Figures S6 to S8).

#### 312 *Host tree size*

313 We next asked how the equilibrium size of the host trees – determined by the  
314 carrying capacity  $K$  – affects the dynamics of parasite spread. In the absence of the  
315 phylogenetic distance effect, increasing host tree size results in both an increasing  
316 probability of parasite survival and an increasing number of infected hosts at the end  
317 of simulations where parasites do survive (Figure 5). Both of these results are  
318 straightforward in the light of standard epidemiological models with density-  
319 dependent transmission in well-mixed host populations (Keeling & Rohani 2008). In  
320 the presence of the phylogenetic distance effect, there is a comparatively modest  
321 increase in the parasite survival probability with increasing host tree size, and no  
322 change in the infection frequency. This is because from any given infected host

323 species, the number of uninfected hosts that can be reached through host-shifts will  
324 generally be limited by the phylogenetic distance effect rather than the total size of  
325 the tree.

326

### 327 *Dynamics of host diversification*

328 The results presented above all assumed that host trees evolved under the same  
329 birth-death process, with a speciation rate of  $\lambda=1$  and an extinction rate of  $\mu=0.5$ . In  
330 order to explore the impact of host diversification on parasite spread, we generated  
331 sets of host trees with increasing values of  $\lambda$  and  $\mu$  while keeping the difference  $\lambda-\mu$   
332 constant. This means that for all sets of host trees generated, the host trees will  
333 initially grow at the same net diversification rate but when they reach their carrying  
334 capacity, the rate at which new host species are born and go extinct increases (both  
335 occurring at rate  $\mu$ ).

336 Figure 6A shows that in the presence of the phylogenetic distance effect, the host  
337 tree sets generated in this way vary strongly in both the parasite survival probability  
338 and the fraction of infected host species. When host trees evolve with very low  
339 speciation and extinction rates, the parasites almost always become extinct, and if  
340 they survive they reach only a very low infection frequency. This is because  
341 branches are very long in such host trees, resulting in large phylogenetic distances  
342 between host species that are difficult to overcome by the parasites. When  $\lambda$  and  $\mu$   
343 are high, there will be much turnover in host species and genetic distances will  
344 become short so that parasite spread is facilitated, resulting in a high fraction of  
345 simulations where parasites survive and reach high infection frequencies.

346 In the absence of the phylogenetic distance effect, mean infection frequencies are  
347 not affected by  $\lambda$  and  $\mu$  (Figure 6B). However, the probability of parasite survival  
348 decreases slightly with increasing  $\lambda$  and  $\mu$ . This is because host species numbers  
349 vary more through time with high than with low host speciation and extinction rates  
350 (results not shown), producing correspondingly strong stochastic variation in  
351 infection rates. As a result, when  $\lambda$  and  $\mu$  are high, stochastic parasite extinction is  
352 more likely than when  $\lambda$  and  $\mu$  are low.

353 Finally, we explored whether host net diversification rate ( $\lambda-\mu$ ) or species turnover  
354 ( $\mu/\lambda$ ) had any impact on the dynamics of parasite spread beyond the impact of the  
355 rate of speciation and extinction in the steady state discussed above. We generated  
356 eight additional sets of host trees with different combinations of values for  $\lambda-\mu$  and  
357  $\mu/\lambda$  (see SI section 1.4). Under the phylogenetic distance effect, the parasite survival  
358 rate and the fraction of infected hosts increases with both net diversification rate and  
359 host species turnover on these trees (Figure S9A). However, the results are always  
360 very similar with identical host extinction rates, suggesting that early host tree  
361 evolution was not important. In the absence of the phylogenetic distance effect,  
362 different host tree sets only differ mainly in the fraction of simulations where the  
363 parasites survived (Figure S9B), presumably again due to different degrees of  
364 stochastic fluctuations in host tree size.

## 365 Discussion

366 Using a mathematical model, we have investigated how the phylogenetic distance  
367 effect (preferential host-shifts between closely related species) impacts the  
368 prevalence and distribution of parasites across host species. Our model makes a



369 number of predictions: all else being equal, 1) host trees in which most species are  
370 found in a few large clades should harbour more parasites than those consisting of  
371 many small clades, 2) host trees characterised by high species turnover (including  
372 rapid adaptive radiations) should harbour more parasites than host trees that are  
373 evolutionarily more inert, and 3) small and isolated clades within trees should  
374 harbour fewer parasites than large clades. These predictions can be tested without  
375 any cophylogenetic analyses and indeed, without any knowledge about phylogenetic  
376 relationships between the parasites. In contrast to previous models where parasites  
377 only switch between extant host species (Engelstädter & Hurst 2006; de Vienne *et*  
378 *al.* 2007; Cuthill & Charleston 2013; Waxman *et al.* 2014), in our model parasite and  
379 host diversification occurs concurrently and potentially on similar time scales.

380 The power of our predictions depends on how strong the phylogenetic distance effect  
381 is, both in absolute terms and relative to other effects. The phylogenetic distance  
382 effect emerges from the fact that related species tend to be physiologically and  
383 immunologically similar, thus increasing the chances that a parasite can successfully  
384 replicate in a new host. However, relevant host traits such as the presence or  
385 absence of certain cell surface receptors may also evolve repeatedly during host  
386 diversification. This can give rise to 'clade effects' in which a host clade that is only  
387 distantly related to a donor host may nevertheless have a high propensity to be  
388 recipients of a parasite (Longdon *et al.* 2011; Waxman *et al.* 2014). Moreover, the  
389 probability of host-shifts will depend not only on similarity between host species, but  
390 also on opportunities for parasites from one species to encounter hosts from another  
391 species. This means that both geographical range overlap and ecological  
392 interactions between donor and potential recipient host species may be important

393 determinants of host-shifts. These factors may obscure the phylogenetic distance  
394 effect.

395 Little is known about the relative importance of (phylo)genetic vs. ecological factors  
396 for host-shifts, but it appears that this varies widely across systems. On the one  
397 hand, several pathogens (e.g., influenza viruses and *Mycobacterium tuberculosis*)  
398 have shifted between humans and domesticated animals such as cattle or fowl –  
399 species that are only distantly related to humans but have close physical contact  
400 (Smith *et al.* 2009; Ren *et al.* 2016). On the other hand, several studies have  
401 reported evidence for a strong phylogenetic distance effect. For example, in  
402 microalgae-virus associations in the open sea where no ecological barriers to host-  
403 shifts should exist, there was a clear signal for the phylogenetic distance effect  
404 (Bellec *et al.* 2014). In a study of rabies in bats, host genetic distance was identified  
405 as a key factor for host-shifts whereas ecological factors (range overlap and  
406 similarities in roost structures) had no predictive power (Faria *et al.* 2013).

407 The case of *Wolbachia*, an intracellular bacterium infecting nematodes and  
408 arthropods (Werren *et al.* 2008), indicates that even for a single parasite there may  
409 be considerable variation in the relative importance of different factors affecting host-  
410 shift rates. For example, *Wolbachia* underwent preferential host-shifts to related  
411 species within the spider genus *Agelenopsis* (Baldo *et al.* 2008). By contrast, in  
412 mushroom-associated dipterans, ecological similarity (mycophagous vs. non-  
413 mycophagous) appeared to be an important determinant of *Wolbachia* host-shifts  
414 whereas host phylogeny and sympatry did not appear to play a major role (Stahlhut  
415 *et al.* 2010). In bees, neither phylogenetic relatedness between hosts nor ecological  
416 interactions (kleptoparasitism) predicted *Wolbachia* host-shifts (Gerth *et al.* 2013).

417 Among different orders of arthropods, our prediction that larger clades should have  
418 higher infection levels than smaller clades is not supported in *Wolbachia* (Weinert *et*  
419 *al.* 2015), perhaps indicating that at least at this level the phylogenetic distance effect  
420 is not important. Overall, the *Wolbachia*-arthropod system is characterised by  
421 complex patterns of codiversification that differ between *Wolbachia* strains and host  
422 taxa and that we are only beginning to understand (e.g., Gerth *et al.* 2014; Bailly-  
423 Bechet *et al.* 2017).

424 In order to keep our model as simple as possible we made several assumptions.  
425 Most importantly, we assumed that each parasite species is strictly associated with a  
426 single host species only. This assumption will be met in parasites that are highly  
427 specialised on their hosts or that are vertically transmitted, so that transmission  
428 between host individuals belonging to different species is very limited. For parasites  
429 infecting multiple hosts, we expect that the phylogenetic distance effect should be  
430 less pronounced and our results therefore less applicable. For parasite speciation,  
431 we assumed barring host-shifts, parasites speciate if and only if their hosts speciate.  
432 Both parasite loss during host speciation and parasite speciation within a host could  
433 be incorporated into our model (which already allows for multiple parasites per host),  
434 but we do not expect this to affect our results qualitatively. Host-shifts were modelled  
435 as density-dependent transmission events, i.e. the more host species there are  
436 within the host phylogeny, the greater the rate of host-shifts for a parasite. Given that  
437 tree size was roughly constant and not affected by the parasites in our model, we  
438 again believe that the assumption of density-dependent (as opposed to frequency-  
439 dependent) transmission is not crucial to our results. Finally, we assumed an  
440 exponential decline in host-shift rates with increasing phylogenetic distance between

441 hosts. This is arguably the simplest function one can assume for this relationship. A  
442 sigmoidal relationship has also been proposed (Engelstädter & Hurst 2006) and in a  
443 study of RNA viruses in mammals was found to explain the data better than the  
444 exponential function (Cuthill & Charleston 2013), but it remains to be seen how  
445 general this result is.

446 In conclusion, we have developed a model of host-parasite codiversification that  
447 should be most suitable for parasites that are host-specific and undergo preferential  
448 host-shifts according to the phylogenetic distance effect. Our model provides a novel  
449 framework to understand host-shift dynamics across large numbers of host species  
450 and over long evolutionary time periods. This framework has enabled the generation  
451 of several testable predictions regarding the distribution and frequency of parasites,  
452 highlighting the importance of host phylogeny in shaping the process of  
453 codiversification.

454

## 455 **Acknowledgments**

456 We thank Sylvain Charlat, Ben Longdon, Daniel Ortiz-Barrientos and Tanja Stadler  
457 for helpful discussions and Sylvain Charlat, Ben Longdon, Nathan Medd, Damien de  
458 Vienne and Lucy Weinert for insightful comments on our manuscript. NF  
459 acknowledges funding from an Australian Postgraduate Award and a Global Change  
460 Scholars Award from The University of Queensland.

461

## 462 **References**

463 1.

464 Alcalá, N., Jenkins, T., Christe, P. & Vuilleumier, S. (2017). Host shift and  
465 cospeciation rate estimation from co-phylogenies. *Ecol Lett*, 20, 1014-1024.

466 2.

467 Bailly-Bechet, M., Martins-Simoes, P., Szollosi, G.J., Mialdea, G., Sagot, M.F. &  
468 Charlat, S. (2017). How Long Does *Wolbachia* Remain on Board? *Mol Biol Evol*,  
469 34, 1183-1193.

470 3.

471 Baldo, L., Ayoub, N.A., Hayashi, C.Y., Russell, J.A., Stahlhut, J.K. & Werren, J.H.  
472 (2008). Insight into the routes of *Wolbachia* invasion: high levels of horizontal  
473 transfer in the spider genus *Agelenopsis* revealed by *Wolbachia* strain and  
474 mitochondrial DNA diversity. *Mol. Ecol.*, 17, 557-569.

475 4.

476 Bates, D., Mächler, M., Bolker, B. & Walker, S. (2015). Fitting Linear Mixed-Effect  
477 Models Using lme4. *Journal of Statistical Software*, 67, 1-48.

478 5.

479 Baudet, C., Donati, B., Sinimeri, B., Crescenzi, P., Gautier, C., Matias, C. *et al.*  
480 (2015). Cophylogeny reconstruction via an approximate Bayesian computation.  
481 *Syst Biol*, 64, 416-431.

482 6.

483 Bellec, L., Clerissi, C., Edern, R., Foulon, E., Simon, N., Grimsley, N. *et al.* (2014).  
484 Cophylogenetic interactions between marine viruses and eukaryotic  
485 picophytoplankton. *BMC Evol Biol*, 14, 59.

486 7.

487 Charleston, M.A. & Robertson, D.L. (2002). Preferential Host Switching by Primate  
488 Lentiviruses Can Account for Phylogenetic Similarity with the Primate Phylogeny.  
489 *Syst. Biol.*, 51 528-535.

490 8.

491 Choi, Y.J. & Thines, M. (2015). Host Jumps and Radiation, Not Co-Divergence  
492 Drives Diversification of Obligate Pathogens. A Case Study in Downy Mildews and  
493 Asteraceae. *PLoS One*, 10, e0133655.

494 9.

495 Clark, N.J. & Clegg, S.M. (2017). Integrating phylogenetic and ecological distances  
496 reveals new insights into parasite host specificity. *Mol Ecol*, 26, 3074-3086.

497 10.

498 Clayton, D.H., Bush, S.E., Goates, B.M. & Johnson, K.P. (2003). Host defense  
499 reinforces host-parasite cospeciation. *PNAS*, 100, 15694-15699.

500 11.

501 Colless, D.H. (1982). Book Review of "Phylogenetics: The Theory and Practice of  
502 Phylogenetic Systematics", by E. O. Wiley. *Syst Zool*, 31, 100-104.

503 12.

504 Crook, M. (2014). The dauer hypothesis and the evolution of parasitism: 20 years on  
505 and still going strong. *Int J Parasitol*, 44, 1-8.

506 13.

507 Cuthill, J.H. & Charleston, M.A. (2013). A Simple Model Explains the Dynamics of  
508 Preferential Host Switching among Mammal Rna Viruses. *Evolution*, 67, 980-990.

509 14.

510 de Vienne, D.M., Giraud, T. & Shykoff, J.A. (2007). When can host shifts produce  
511 congruent host and parasite phylogenies? A simulation approach. *J. Evol. Biol.*,  
512 20, 1428-1438.

513 15.

514 de Vienne, D.M., Hood, M.E. & Giraud, T. (2009). Phylogenetic determinants of  
515 potential host shifts in fungal pathogens. *J Evol Biol*, 22, 2532-2541.

516 16.

517 de Vienne, D.M., Refregier, G., Lopez-Villavicencio, M., Tellier, A., Hood, M.E. &  
518 Giraud, T. (2013). Cospeciation vs host-shift speciation: methods for testing,  
519 evidence from natural associations and relation to coevolution. *The New*  
520 *phytologist*, 198, 347-385.

521 17.

522 Drinkwater, B. & Charleston, M.A. (2016). Towards sub-quadratic time and space  
523 complexity solutions for the dated tree reconciliation problem. *Algorithms Mol Biol*,  
524 11, 15.

525 18.

526 Engelstädter, J. & Hurst, G.D.D. (2006). The dynamics of parasite incidence across  
527 host species. *Evol. Ecol.*, 20, 603-616.

528 19.

529 Faria, N.R., Suchard, M.A., Rambaut, A., Streicker, D.G. & Lemey, P. (2013).  
530 Simultaneously reconstructing viral cross-species transmission history and  
531 identifying the underlying constraints. *Philosophical transactions of the Royal*  
532 *Society of London. Series B, Biological sciences*, 368, 20120196.

533 20.

534 Gerth, M., Gansauge, M.T., Weigert, A. & Bleidorn, C. (2014). Phylogenomic  
535 analyses uncover origin and spread of the Wolbachia pandemic. *Nat Commun*, 5,  
536 5117.

537 21.

538 Gerth, M., Rothe, J. & Bleidorn, C. (2013). Tracing horizontal Wolbachia movements  
539 among bees (Anthophila): a combined approach using multilocus sequence typing  
540 data and host phylogeny. *Mol Ecol*, 22, 6149-6162.

541 22.

542 Gilbert, G.S. & Webb, C.O. (2007). Phylogenetic signal in plant pathogen-host range.  
543 *Proc Natl Acad Sci U S A*, 104, 4979-4983.

544 23.

545 Heard, S.B. (1992). Patterns in Tree Balance among Cladistic, Phenetic, and  
546 Randomly Generated Phylogenetic Trees. *Evolution*, 46, 1818-1826.

547 24.

548 Hurst, C.J. (2016). *The Rasputin effect : when commensals and symbionts become*  
549 *parasitic*. Springer.

550 25.

551 Keeling, M.J. & Rohani, P. (2008). *Modeling infectious diseases in humans and*  
552 *animals*. Princeton University Press, Princeton.

553 26.

554 Longdon, B., Brockhurst, M.A., Russell, C.A., Welch, J.J. & Jiggins, F.M. (2014). The  
555 evolution and genetics of virus host shifts. *PLoS Pathog*, 10, e1004395.

556 27.



- 557 Longdon, B., Hadfield, J.D., Day, J.P., Smith, S.C., McGonigle, J.E., Cogni, R. *et al.*  
558 (2015). The causes and consequences of changes in virulence following pathogen  
559 host shifts. *PLoS Pathog*, 11, e1004728.
- 560 28.
- 561 Longdon, B., Hadfield, J.D., Webster, C.L., Obbard, D.J. & Jiggins, F.M. (2011). Host  
562 phylogeny determines viral persistence and replication in novel hosts. *PLoS*  
563 *Pathog*, 7, e1002260.
- 564 29.
- 565 Oksanen, J., Blanchet, F.G., Michael Friendly, M., Kindt, R., Legendre, P., McGlinn,  
566 D. *et al.* (2017). vegan: Community Ecology Package.
- 567 30.
- 568 Paradis, E., Claude, J. & Strimmer, K. (2004). APE: analyses of phylogenetics and  
569 evolution in R language. *Bioinformatics*, 20, 289-290.
- 570 31.
- 571 Perlman, S.J. & Jaenike, J. (2003). Infection success in novel hosts: an experimental  
572 and phylogenetic study of *Drosophila* -parasitic nematodes. *Evolution*, 57, 544-  
573 557.
- 574 32.
- 575 R Core Team (2017). R: A language and environment for statistical computing. R  
576 Foundation for Statistical Computing, Vienna, Austria. URL [https://www.R-](https://www.R-project.org/)  
577 [project.org/](https://www.R-project.org/).
- 578 33.

579 Ren, H., Jin, Y., Hu, M., Zhou, J., Song, T., Huang, Z. *et al.* (2016). Ecological  
580 dynamics of influenza A viruses: cross-species transmission and global migration.  
581 *Scientific reports*, 6, 36839.

582 34.

583 Revolution Analytics & Weston, S. (2015a). doParallel: Foreach Parallel Adaptor for  
584 the 'parallel' Package. R package version 1.0.10. [https://CRAN.R-](https://CRAN.R-project.org/package=doParallel)  
585 [project.org/package=doParallel](https://CRAN.R-project.org/package=doParallel).

586 35.

587 Revolution Analytics & Weston, S. (2015b). foreach: Provides Foreach Looping  
588 Construct for R. R package version 1.4.3. [https://CRAN.R-](https://CRAN.R-project.org/package=foreach)  
589 [project.org/package=foreach](https://CRAN.R-project.org/package=foreach).

590 36.

591 Ricklefs, R.E., Outlaw, D.C., Svensson-Coelho, M., Medeiros, M.C., Ellis, V.A. &  
592 Latta, S. (2014). Species formation by host shifting in avian malaria parasites.  
593 *Proc Natl Acad Sci U S A*, 111, 14816-14821.

594 37.

595 Russell, J.A., Goldman-Huertas, B., Moreau, C.S., Baldo, L., Stahlhut, J.K., Werren,  
596 J.H. *et al.* (2009). Specialization and Geographic Isolation among Wolbachia  
597 Symbionts from Ants and Lycaenid Butterflies. *Evolution*, 63, 624-640.

598 38.

599 Sharp, P.M., Bailes, E., Gao, F., Beer, B.E., Hirsch, V.M. & Hahn, B.H. (2000).  
600 Origins and evolution of AIDS viruses: estimating the time-scale. *Biochem Soc*  
601 *Trans*, 28, 275-282.

602 39.

603 Smith, N.H., Hewinson, R.G., Kremer, K., Brosch, R. & Gordon, S.V. (2009). Myths  
604 and misconceptions: the origin and evolution of *Mycobacterium tuberculosis*.  
605 *Nature reviews. Microbiology*, 7, 537-544.

606 40.

607 Stahlhut, J.K., Desjardins, C.A., Clark, M.E., Baldo, L., Russell, J.A., Werren, J.H. *et*  
608 *al.* (2010). The mushroom habitat as an ecological arena for global exchange of  
609 *Wolbachia*. *Mol. Ecol.*, 19, 1940-1952.

610 41.

611 Streicker, D.G., Turmelle, A.S., Vonhof, M.J., Kuzmin, I.V., McCracken, G.F. &  
612 Rupprecht, C.E. (2010). Host phylogeny constrains cross-species emergence and  
613 establishment of rabies virus in bats. *Science*, 329, 676-679.

614 42.

615 Taylor, L.H., Latham, S.M. & Woolhouse, M.E.J. (2001). Risk factors for human  
616 disease emergence. *Philos. Trans. R. Soc. Lond., Ser. B: Biol. Sci.*, 356, 983-989.

617 43.

618 Tinsley, M.C. & Majerus, M.E.N. (2007). Small steps or giant leaps for male-killers?  
619 Phylogenetic constraints to male-killer host shifts. *Bmc Evolutionary Biology*, 7.

620 44.

621 Waxman, D., Weinert, L.A. & Welch, J.J. (2014). Inferring host range dynamics from  
622 comparative data: the protozoan parasites of new world monkeys. *The American*  
623 *naturalist*, 184, 65-74.

624 45.

- 625 Weinert, L.A., Araujo-Jnr, E.V., Ahmed, M.Z. & Welch, J.J. (2015). The incidence of  
626 bacterial endosymbionts in terrestrial arthropods. *Proceedings. Biological*  
627 *sciences / The Royal Society*, 282, 20150249.
- 628 46.
- 629 Werren, J.H., Baldo, L. & Clark, M.E. (2008). *Wolbachia*: master manipulators of  
630 invertebrate biology. *Nat. Rev. Microbiol.*, 6, 741-751.
- 631 47.
- 632 Werren, J.H., Zhang, W. & Guo, L.R. (1995). Evolution and phylogeny of *Wolbachia*:  
633 Reproductive parasites of arthropods. *Proc. R. Soc. Lond. B*, 261, 55-63.
- 634 48.
- 635 Wickham, H. & Chang, W. (2017). devtools: Tools to Make Developing R Packages  
636 Easier.
- 637 49.
- 638 Wickham, H., Danenberg, P. & Eugster, M. (2017). roxygen2: In-Line Documentation  
639 for R.
- 640 50.
- 641 Wieseke, N., Hartmann, T., Bernt, M. & Middendorf, M. (2015). Cophylogenetic  
642 Reconciliation with ILP. *Ieee Acm T Comput Bi*, 12, 1227-1235.
- 643 51.
- 644 Wolfe, N.D., Dunavan, C.P. & Diamond, J. (2007). Origins of major human infectious  
645 diseases. *Nature*, 447, 279-283.
- 646 52.
- 647 Wood, J.L., Leach, M., Waldman, L., Macgregor, H., Fooks, A.R., Jones, K.E. *et al.*  
648 (2012). A framework for the study of zoonotic disease emergence and its drivers:

649 spillover of bat pathogens as a case study. *Philosophical transactions of the Royal*

650 *Society of London. Series B, Biological sciences*, 367, 2881-2892.

651

652

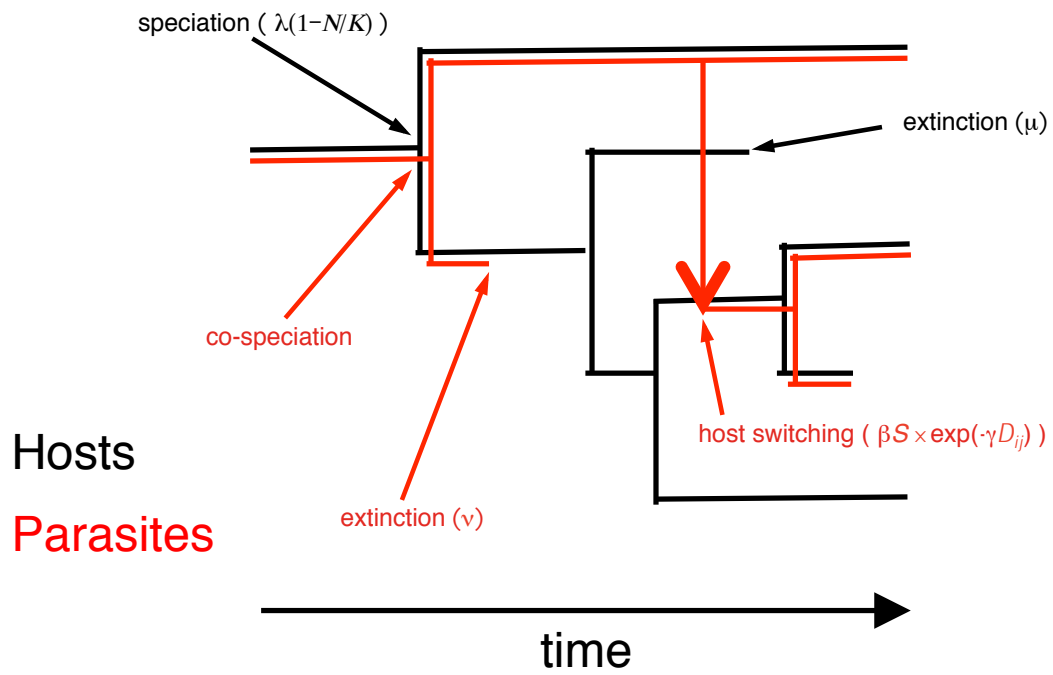

653

654 Figure 1. Illustration of the model; see Methods section for details.

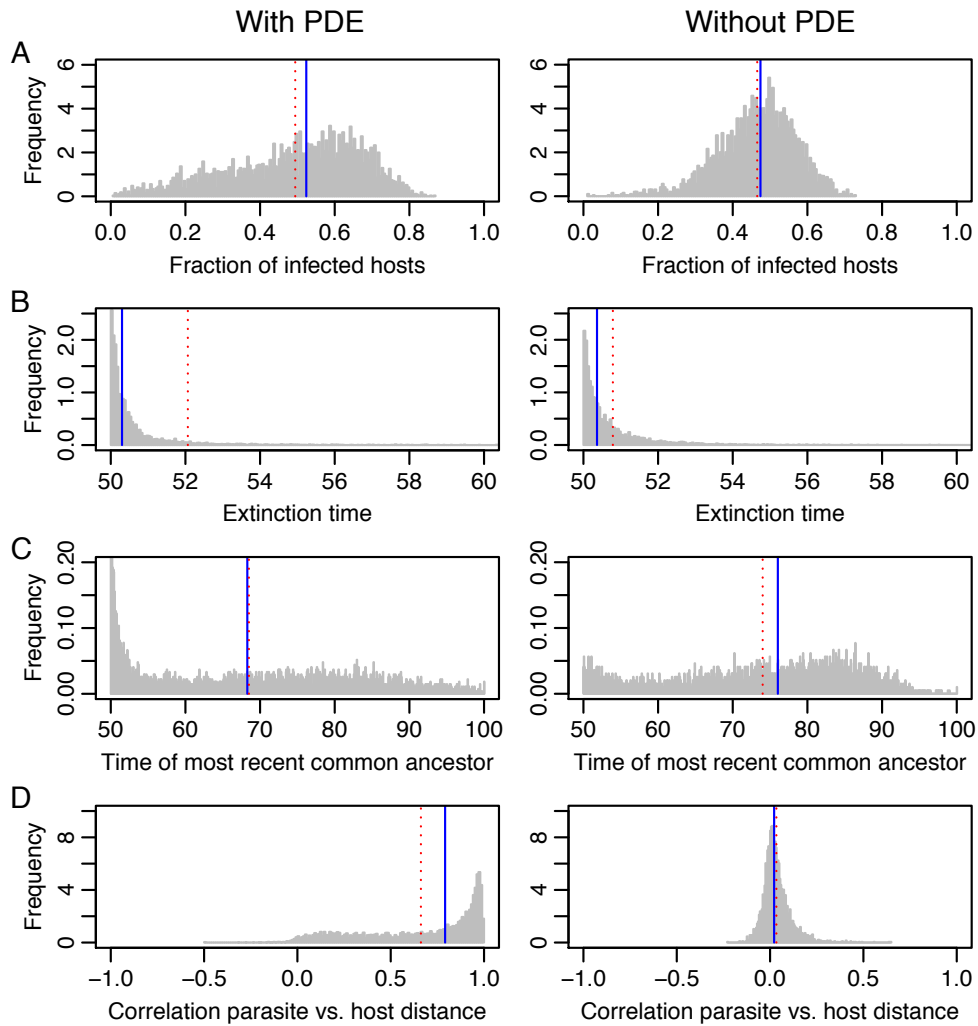

655

656 Figure 2. Summary statistics for simulations in the presence and absence of the  
657 phylogenetic distance effect, with the standard host tree set and standard PDE vs.  
658 no-PDE parameters. Panel (A) shows the distribution of the fraction of infected host  
659 species across the 10,000 simulations, contingent on parasite survival. Panel (B)  
660 shows the distribution of parasite extinction times when the parasite did not survive  
661 following its introduction at time 50. Panel (C) shows the distribution of the time of  
662 the most recent common ancestor of all surviving parasite species (where time=100  
663 is the present). In panel (D), the distribution of the correlation between parasite and  
664 host phylogenetic distances is shown. In all plots, the solid blue line indicates the  
665 median and the dashed red line the mean of the distributions.

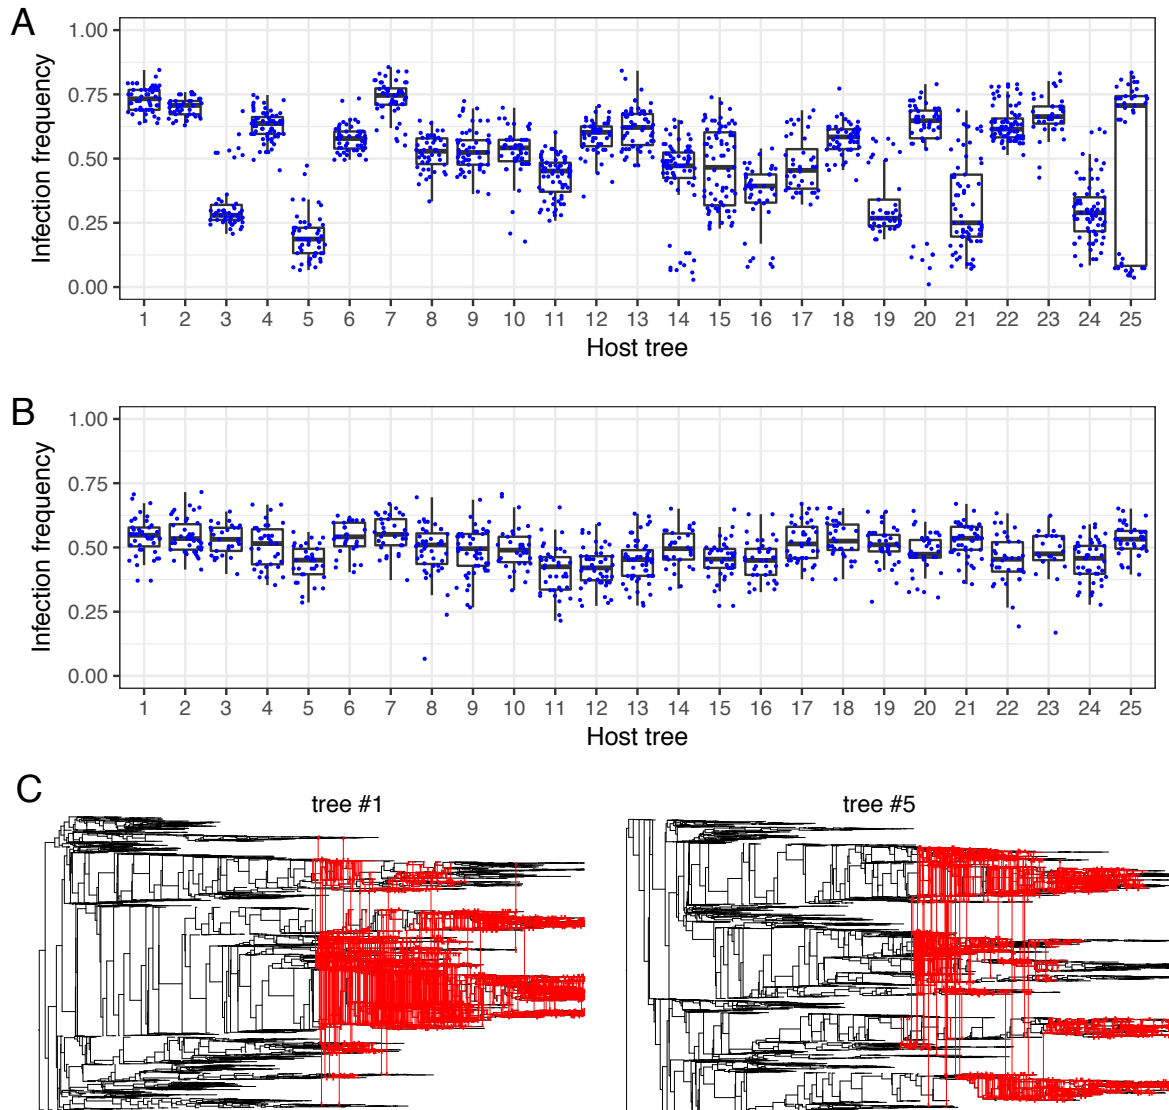

666

667 Figure 3. Distributions of infection frequencies with (A) and without (B) the  
668 phylogenetic distance effect on the first 25 host trees. Each dot shows the fraction of  
669 infected host species at the end of a simulation run. Simulations in which the  
670 parasites did not survive until the end of the simulation are not shown. Boxes show  
671 the interquartile range with the horizontal line indicating the median and whiskers  
672 indicating the distance from the box to the largest value no further than 1.5 times the  
673 interquartile range. All parameters take the standard values. Panel (C) shows  
674 examples host-shift dynamics for two of the host trees in presence of the  
675 phylogenetic distance effect, yielding final infection frequencies of 74% and 24%,  
676 respectively. For larger trees and more examples, see Figure S2.



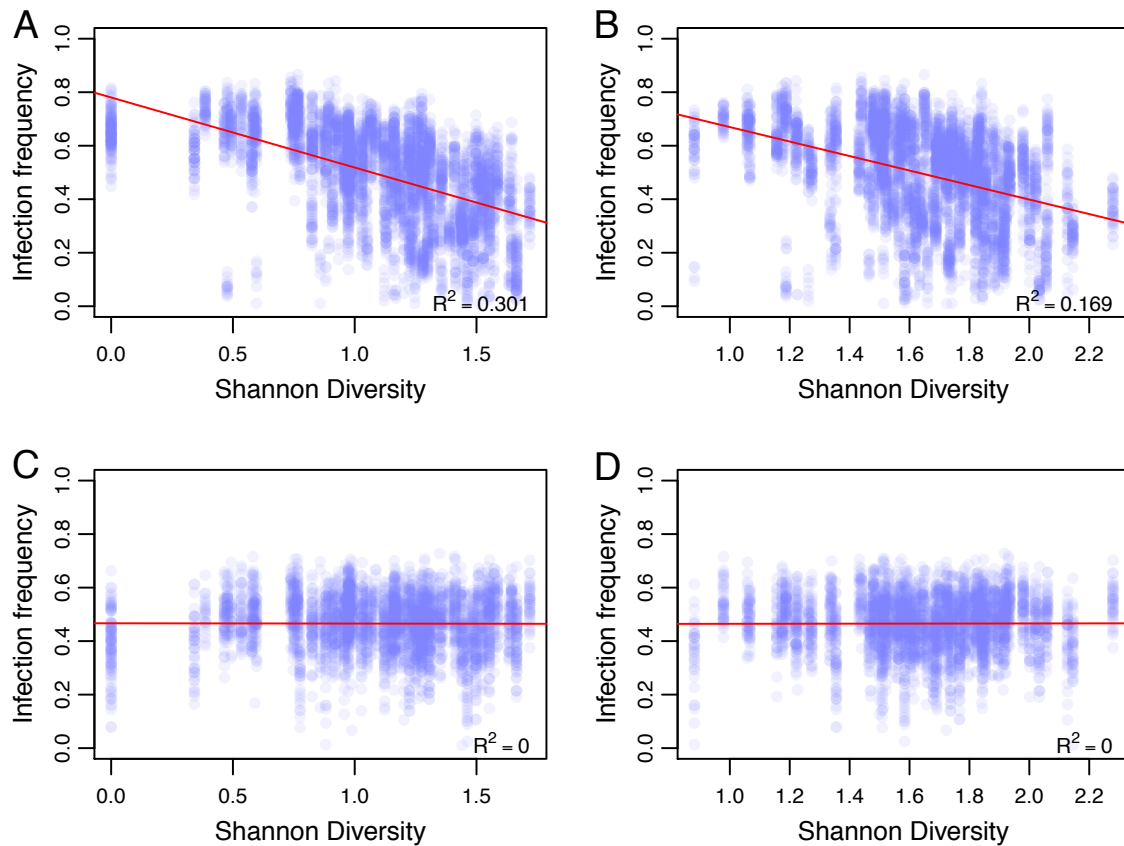

677

678 Figure 4. Fraction of infected hosts at the end of simulations against the Shannon  
679 index of host species distribution within the respective host tree, with (A,B) or without  
680 (C,D) the phylogenetic distance effect. Each dot represents the outcome of a single  
681 simulation; simulations in which the parasites became extinct were discarded.  
682 Partitioning of host trees into subtrees (or clades) and calculating the Shannon index  
683 was performed as described in SI section 1.3, with the height parameter set to either  
684 100 (plots A and C, corresponding to few large subtrees) or 50 (plots B and D,  
685 corresponding to more but smaller subtrees). Red lines show the fit of a linear  
686 regression with  $R^2$  values indicated. All parameters take standard values.

687

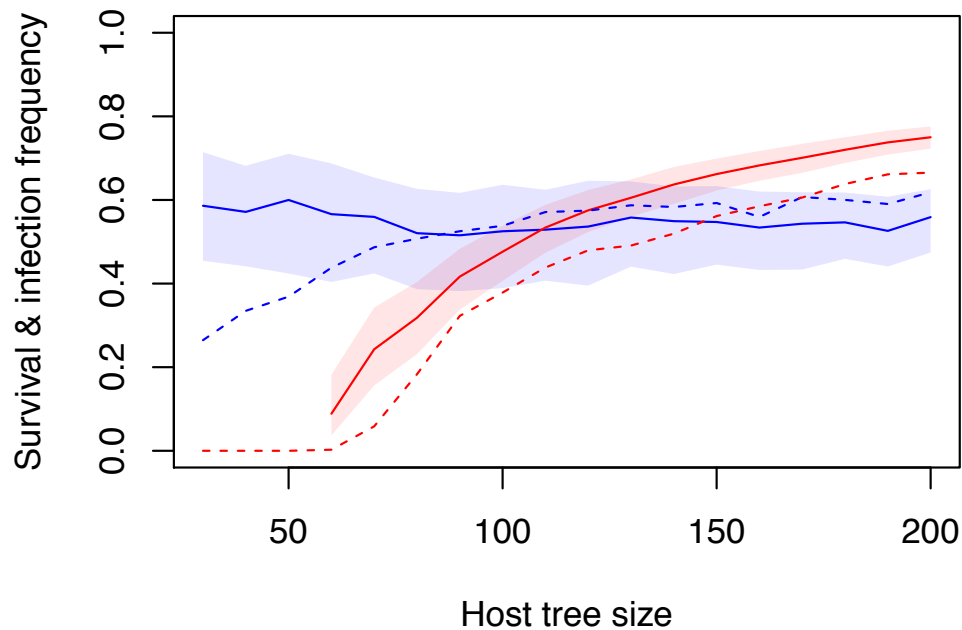

688

689 Figure 5. Influence of the equilibrium host tree size on parasite survival rates and  
690 infection frequencies in presence (blue) and absence (red) of the phylogenetic  
691 distance effect. Dashed lines show the fraction of simulations in which the parasites  
692 invaded the host tree and survived until the end of the simulations. Solid lines show  
693 the median fraction of infected host species at the end of the simulations for those  
694 simulations in which the parasites survived, with shadings indicating the interquartile  
695 range. Equilibrium host tree size was modified by varying the carrying capacity  
696 parameter  $K$  over a range of values from 60 to 400. All other parameters take  
697 standard values.

698

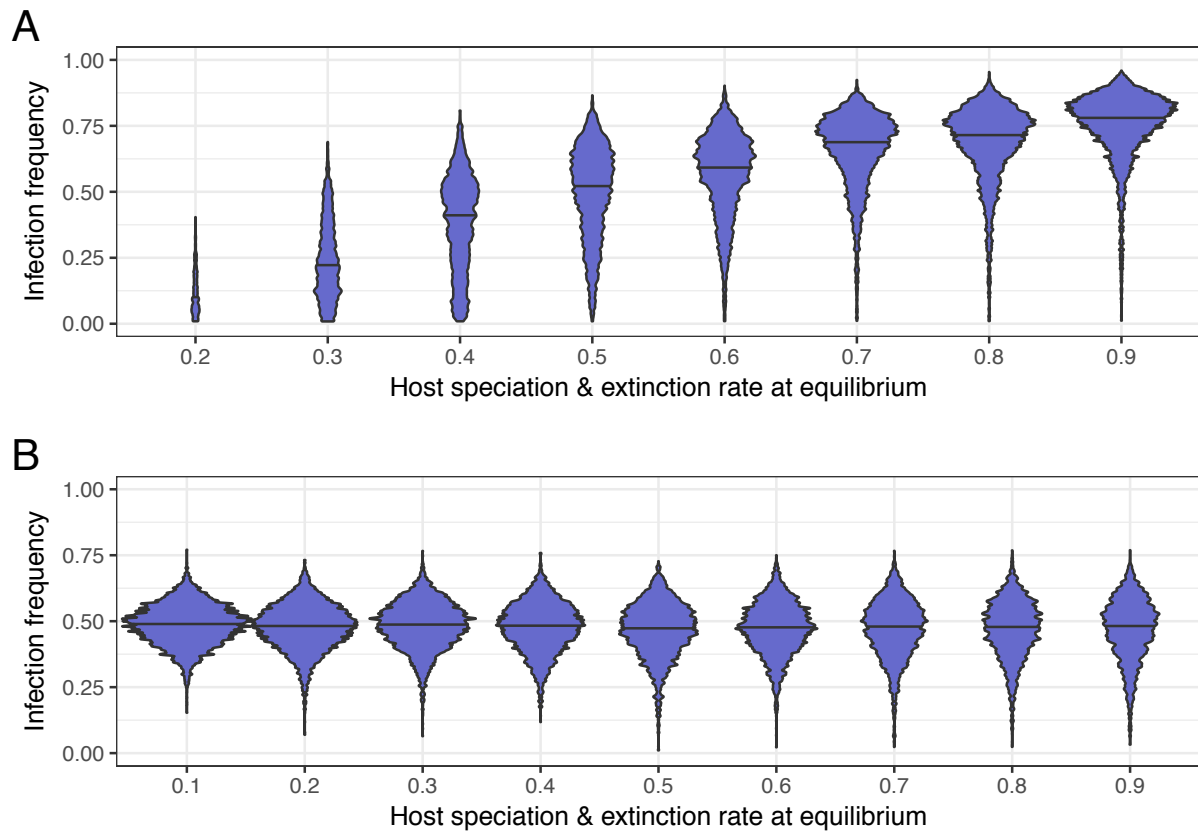

699

700 Figure 6. The impact of host speciation and extinction rate at equilibrium on the  
701 fraction of infected host species with (A) and without (B) the phylogenetic distance  
702 effect. Violins show the distribution of infection frequencies, with the total area of  
703 each violin being proportional to the number of simulations where the parasites  
704 survived. Equilibrium speciation and extinction rates were varied by using host  
705 extinction rates  $\mu$  ranging from 0.1 to 0.9. At the same time, we varied the host  
706 speciation rate  $\lambda$  from 0.6 to 1.4 in order to maintain a constant net diversification  
707 rate of  $\lambda - \mu = 0.5$  during the early stages of host evolution. Parasite parameters take  
708 standard PDE and no-PDE values.

709
